# Supplementary material for: From manual classification to large language models: assessing the quality and consistency of historical convective event records
Source: Copernicus journal article supplement (doi:10.5194/egusphere-2026-199), 2026-02-06
Supplement: Supplementary file [file egusphere-2026-199-AC1-supplement.pdf]

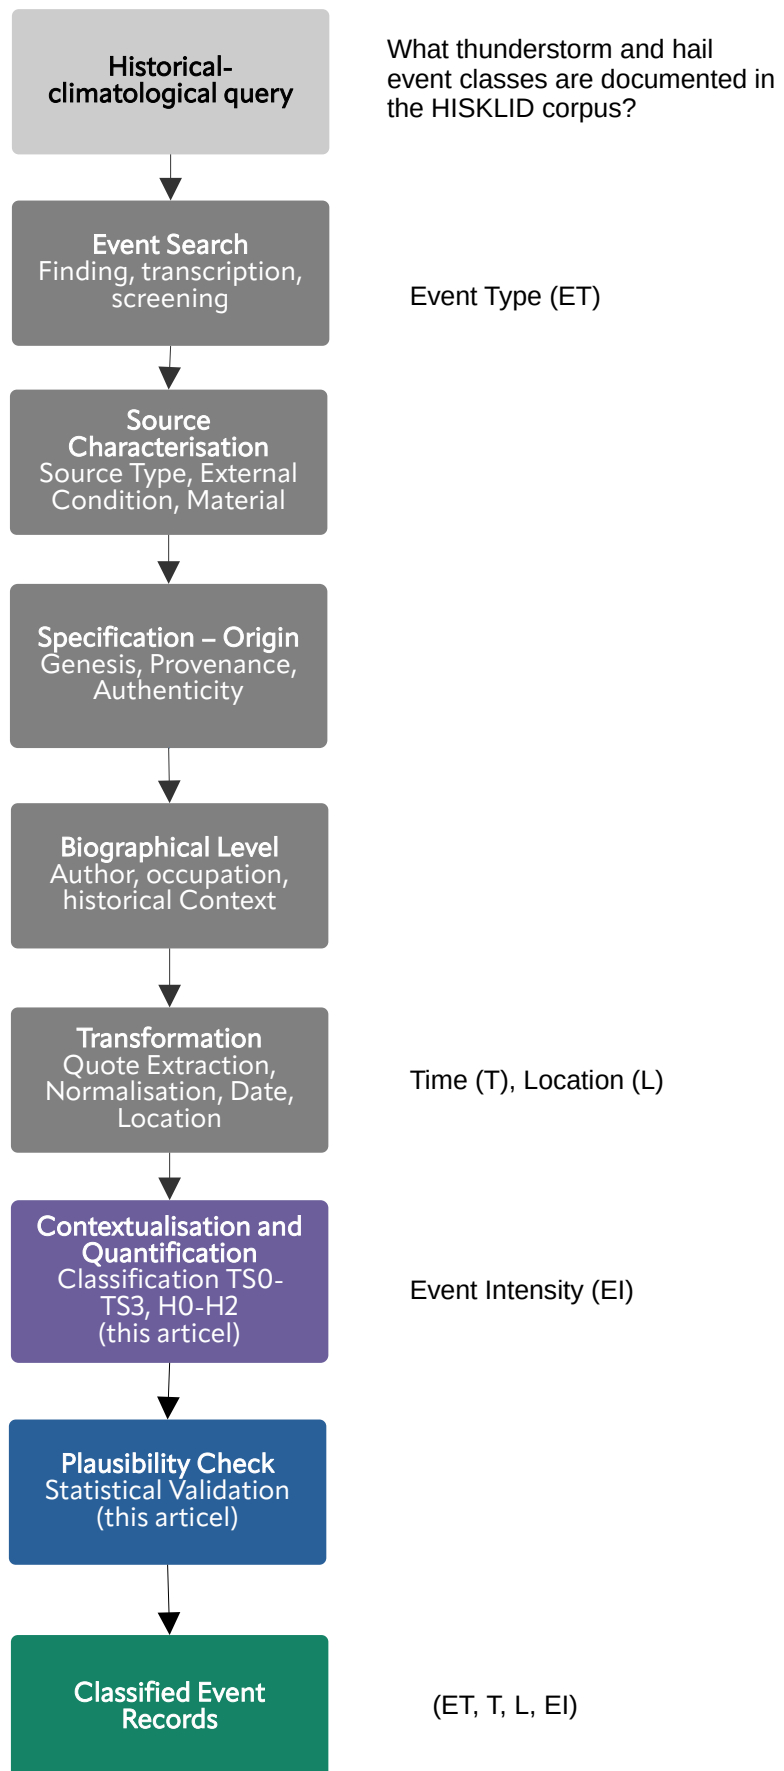

**Fig A:** Simplified overview of the source evaluation workflow as applied in this study, based on Schätz (2023). Starting from a historical-climatological query, raw historical sources are systematically processed through five preparatory stages before the classification step. The Contextualisation and Quantification stage — the focus of the present article — produces the Event Intensity classification (TS0–TS3, H0–H2). The Plausibility Check corresponds to the statistical validation presented in this study. The final output is a structured event record described by the quadruple (ET, T, L, EI).
